# Supplementary figures and images for: WITHDRAWN: Synthesis of Hydrophobic and Hydrophilic Loaded Mesoporous Silica Nanoparticles for Controlled Co-Delivery of Drugs
Source: Research Square preprint supplement (doi:10.21203/rs.3.rs-362465/v1), 2021-04-05

Graphical representation of cancer cell death by releasing of Cur/Dox


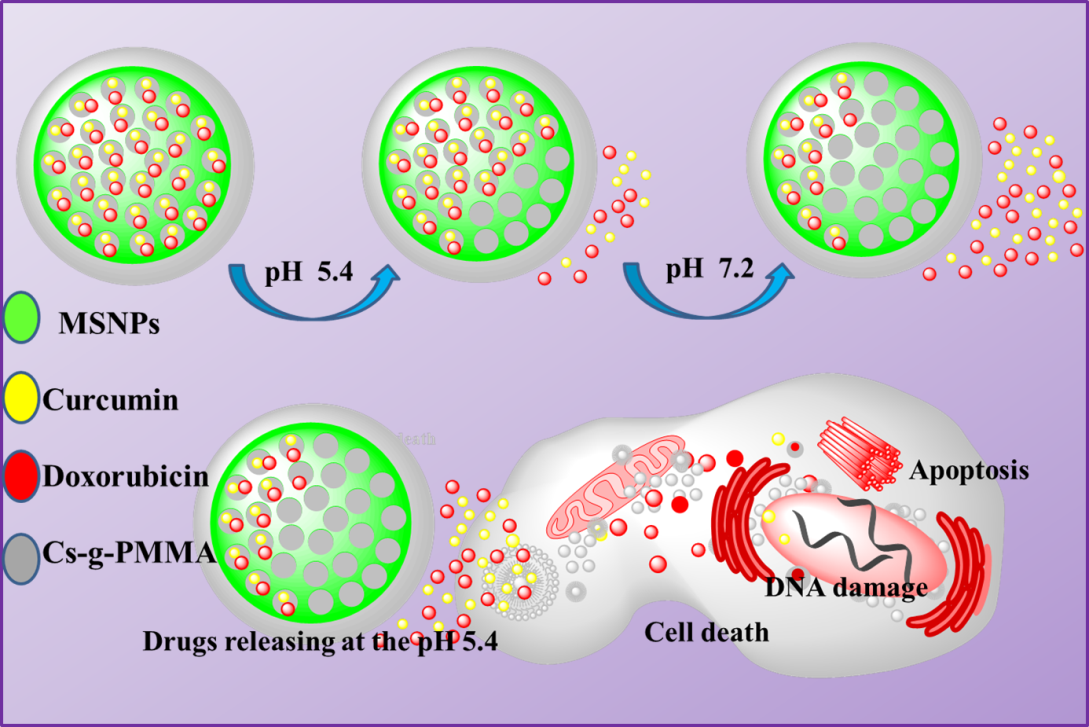

Supplement: Supplementary file 1 [file 12e8d4624a4ed90c3703f3c5.docx]
